# Supplementary material for: Stepwise metabolic engineering of Escherichia coli to produce triacylglycerol rich in medium-chain fatty acids
Source: Biotechnol Biofuels. 2018 Jun 25;11:177. doi: 10.1186/s13068-018-1177-x (PMC6016142; doi:10.1186/s13068-018-1177-x)
Supplement: Supplementary file 10 — Additional file 10: Table S1. 16 media were designed based on the ZYP-5052 auto-induction medium for improving the accumulation of TAGs rich in MCFAs. [file 13068_2018_1177_MOESM10_ESM.docx]

**Table S1.** 16 media were designed based on the auto-induction medium ZYP-5052 for improving the accumulation of TAG rich in medium-chain fatty acid (MCFA).

|  | N-Z-amine | glycerol | MgSO4 | (NH4)2SO4 | Aspartic acid + Serine | Yeast extract | Na2HPO4 | KH2PO4 | Glucose | Lactose | Trace metalsa |
| --- | --- | --- | --- | --- | --- | --- | --- | --- | --- | --- | --- |
|  | (%) | (%) | (mM) | (mM) | (%) | (%) | (mM) | (mM) | (%) | (%) |  |
| ZYP-5052 | 1 | 0.5 | 2 | 25 | 0 | 0.5 | 50 | 50 | 0.05 | 0.2 | 0.2× |
| 1 | 1 | 2 | 0.2 | 5 | 0.1 | - | - | - | - | - | - |
| 2 | 1 | 3 | 1 | 10 | 0.2 | - | - | - | - | - | - |
| 3 | 1 | 4 | 2 | 20 | 0.3 | - | - | - | - | - | - |
| 4 | 1 | 5 | 3 | 25 | 0.5 | - | - | - | - | - | - |
| 5 | 2 | 2 | 2 | 10 | 0.5 | - | - | - | - | - | - |
| 6 | 2 | 3 | 3 | 5 | 0.3 | - | - | - | - | - | - |
| 7 | 2 | 4 | 0.2 | 25 | 0.2 | - | - | - | - | - | - |
| 8 | 2 | 5 | 1 | 20 | 0.1 | - | - | - | - | - | - |
| 9 | 3 | 2 | 3 | 20 | 0.2 | - | - | - | - | - | - |
| 10 | 3 | 3 | 2 | 25 | 0.1 | - | - | - | - | - | - |
| 11 | 3 | 4 | 1 | 5 | 0.5 | - | - | - | - | - | - |
| 12 | 3 | 5 | 0.2 | 10 | 0.3 | - | - | - | - | - | - |
| 13 | 4 | 2 | 1 | 25 | 0.3 | - | - | - | - | - | - |
| 14 | 4 | 3 | 0.2 | 20 | 0.5 | - | - | - | - | - | - |
| 15 | 4 | 4 | 3 | 10 | 0.1 | - | - | - | - | - | - |
| 16 | 4 | 5 | 2 | 5 | 0.2 | - | - | - | - | - | - |

aA stock solution of 0.1 M FeCl3 was dissolved in a 100-fold dilution of concentrated HCl (final concentration 0.12 M HCl). This solution was combined with autoclaved stock solutions of other metals to make a 1000× trace metal mixture containing 50 mM FeCl3, 20 mM CaCl2, 10 mM each of MnCl2 and ZnSO4, and 2 mM each of CoCl2, CuCl2, NiCl2, Na2MoO4, Na2SeO3, and H3BO3 in 60 mM HCl. These solutions were stored at room temperature. Upon prolonged storage, small amounts of precipitate formed in the mixture.
